# Supplementary material for: First Introduction of NiSe2 to Anode Material for Sodium-Ion Batteries: A Hybrid of Graphene-Wrapped NiSe2/C Porous Nanofiber
Source: PubMed Central journal article supplement (PMC4800391; doi:10.1038/srep23338), 2016-03-21
Supplement: srep23338-s1.pdf [file srep23338-s1.pdf]

# Supporting Information

## First Introduction of NiSe<sub>2</sub> to Anode Material for Sodium-Ion Batteries: A Hybrid of Graphene-Wrapped NiSe<sub>2</sub>/C Porous Nanofiber

*Jung Sang Cho, Seung Yeon Lee, and Yun Chan Kang\**

J. S. Cho, Y. L. Lee, and Prof. Y. C. Kang

Department of Materials Science and Engineering

Korea University

Anam-Dong, Seongbuk-Gu

Seoul 136-713, Republic of Korea

E-mail: [yckang@korea.ac.kr](mailto:yckang@korea.ac.kr)

Keywords: Nickel selenide, sodium ion batteries, graphene, carbon composite, electrospinning

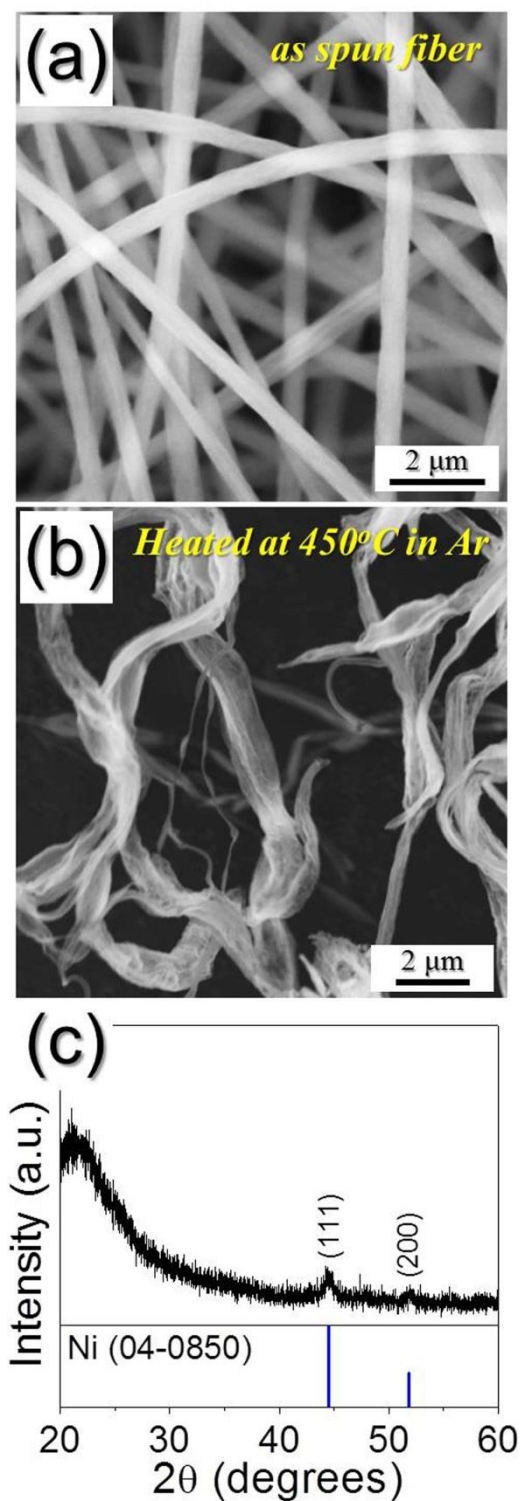

**Figure S1** Morphologies and XRD pattern of the intermediate structures of the  $\text{NiSe}_2$ -rGO-C composite nanofibers. SEM images of the nanofibers (a) before heat treatment, (b) after heat treatment at 450 °C in Ar, and (c) XRD pattern of the nanofibers after heat treatment at 450 °C in Ar.

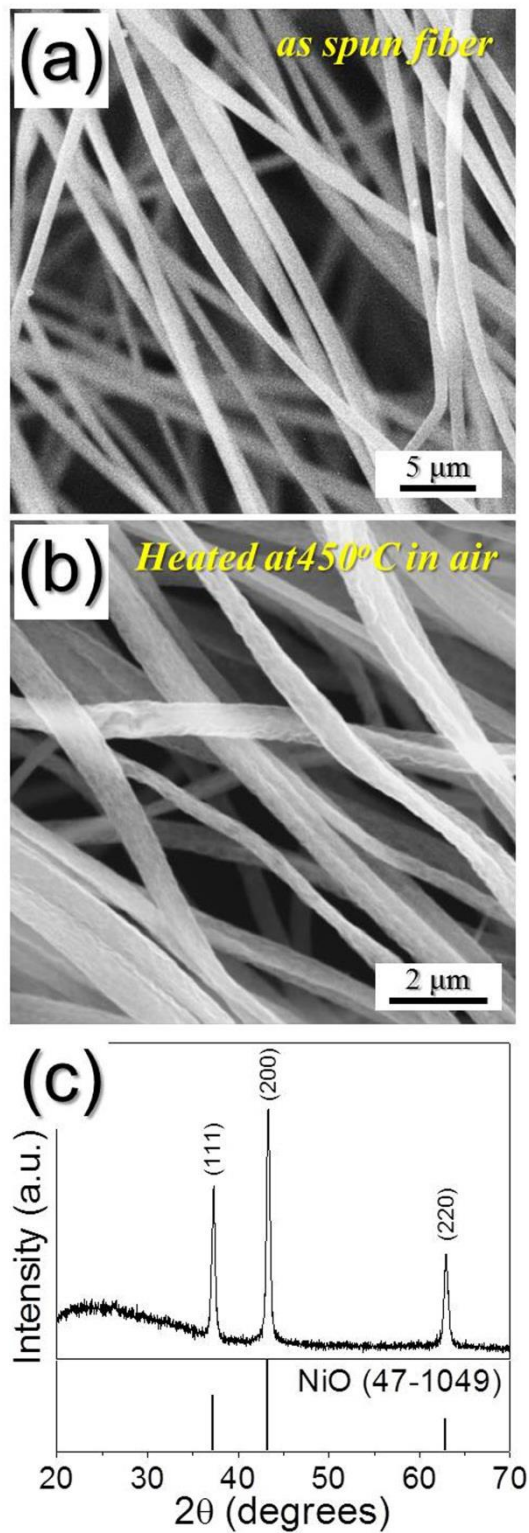

**Figure S2** Morphologies and XRD pattern of the intermediate structures of the bare NiSe<sub>2</sub> nanofibers. SEM images of the nanofibers (a) before heat treatment, (b) after heat treatment at 450 °C in air, and (c) XRD pattern of the nanofibers after heat treatment at 450 °C in air.

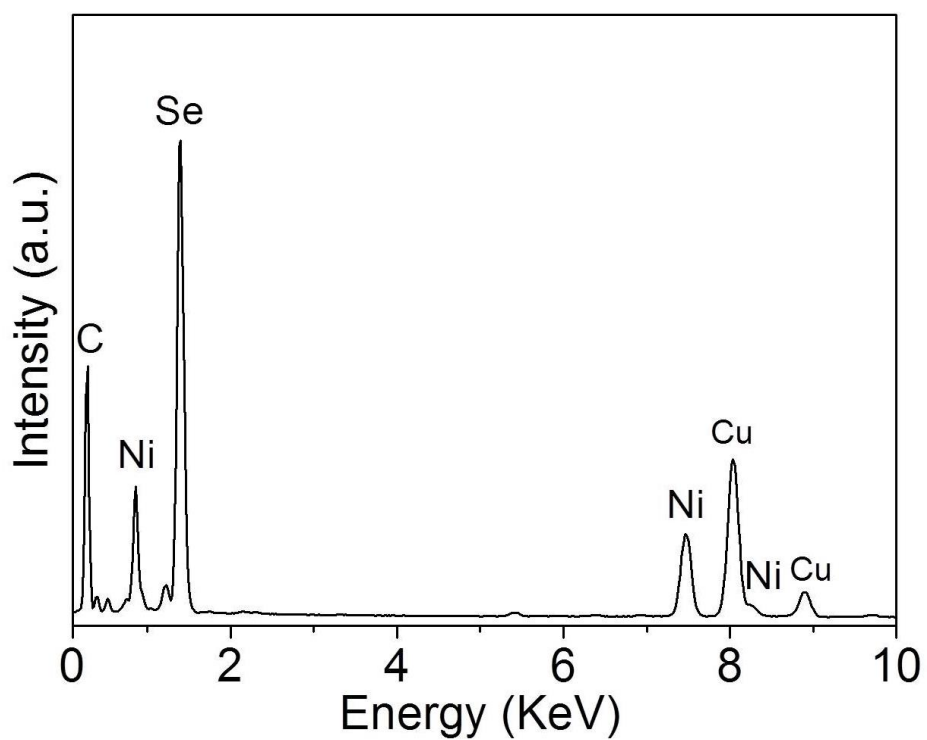

**Figure S3** Energy dispersive spectroscopy (EDS) analysis of the NiSe<sub>2</sub>-rGO-C composite nanofibers formed by selenization process.

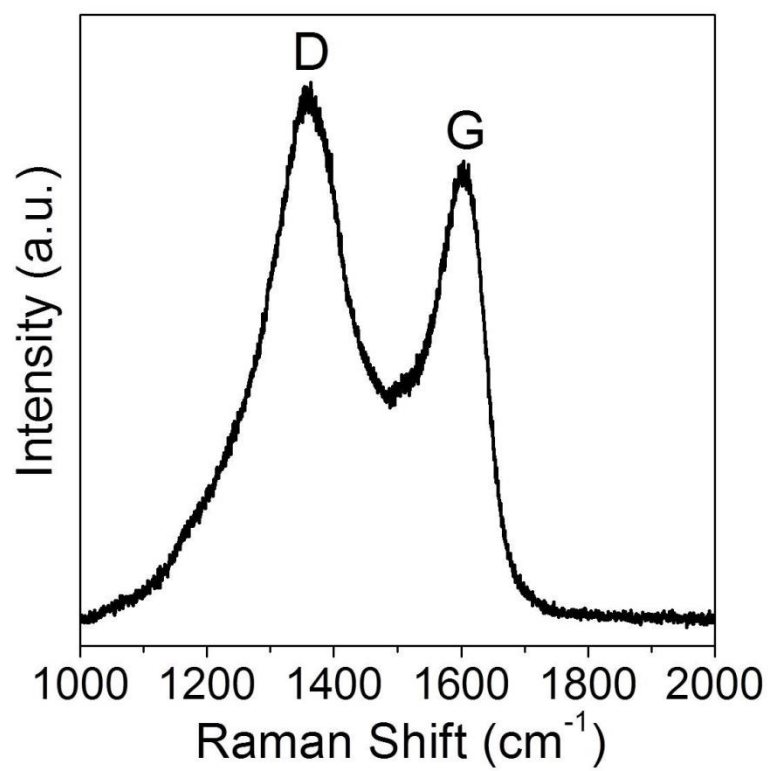

**Figure S4** Raman spectrum of the NiSe<sub>2</sub>-rGO-C composite nanofibers formed by selenization process.

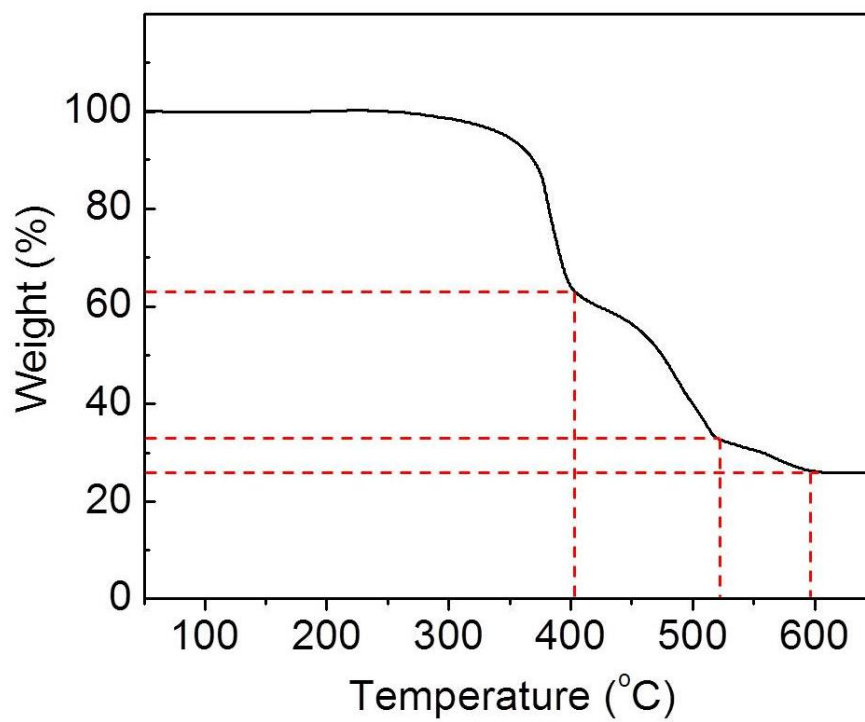

**Figure S5** TG analysis of the NiSe<sub>2</sub>-rGO-C composite nanofibers formed by selenization process.

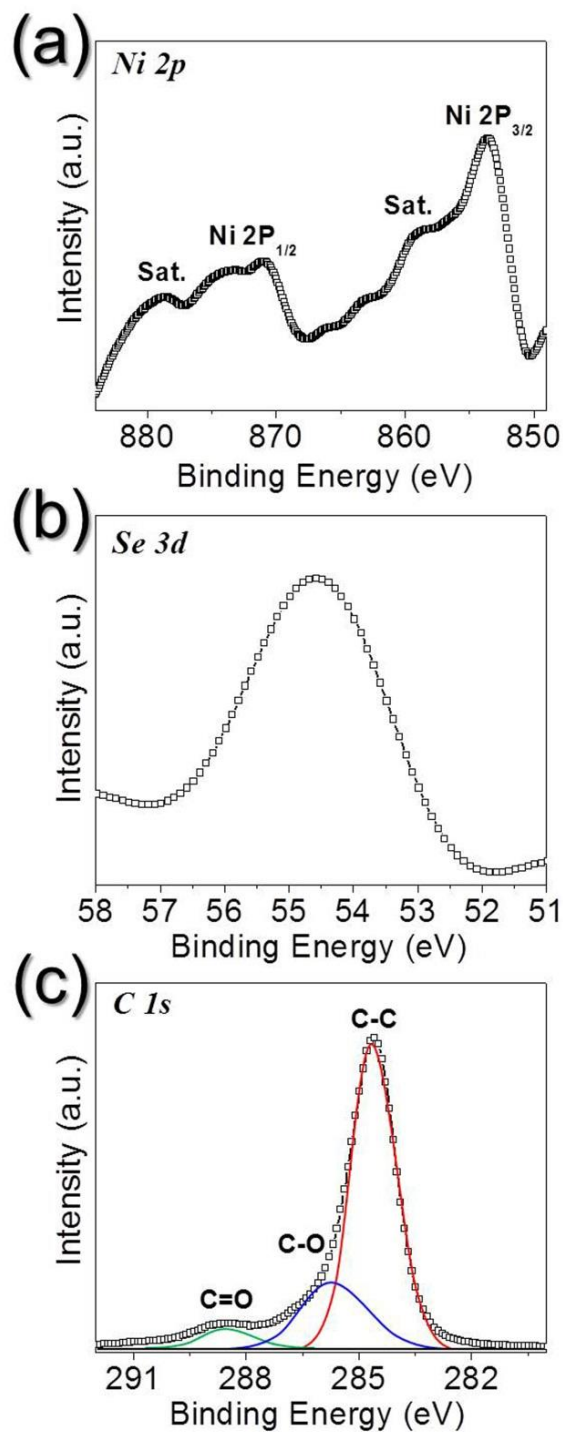

**Figure S6** XPS spectra of the NiSe<sub>2</sub>-rGO-C composite nanofibers formed by selenization process. (a) Ni 2p, (b) Se 3d, and (c) C 1s.

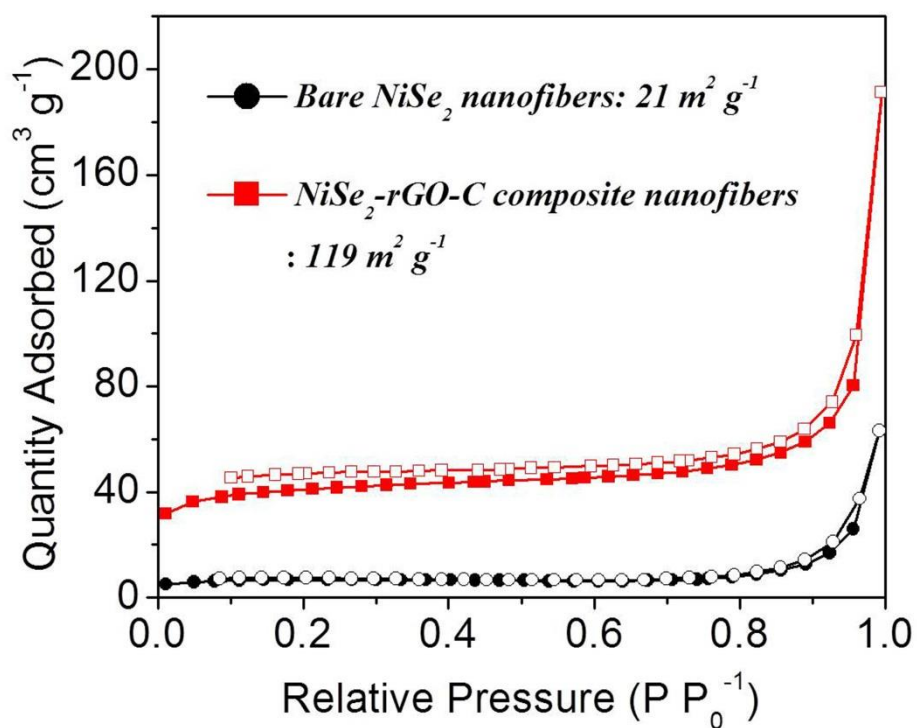

**Figure S7** N<sub>2</sub> adsorption-desorption isotherms measured at 77 K for the NiSe<sub>2</sub>-rGO-C composite and bare NiSe<sub>2</sub> nanofibers.



**Table S1.** Electrochemical properties of the nickel compound materials with various structures as anode materials for NIBs.

| Materials                                         | Voltage Range | Current Density        | Initial Coulombic Efficiency | Initial Discharge/Charge Capacity                      | Last Discharge Capacity    | Cycle Number | Ref       |
|---------------------------------------------------|---------------|------------------------|------------------------------|--------------------------------------------------------|----------------------------|--------------|-----------|
| NiSe <sub>2</sub> -rGO-carbon composite nanofiber | 0.001–3.0 V   | 200 mA g <sup>-1</sup> | 72 %                         | 717 mA h g <sup>-1</sup> /<br>516 mA h g <sup>-1</sup> | 468 mA h g <sup>-1</sup>   | 100          | This work |
| NiO-film                                          | 0.005-3.0 V   | 100 mA g <sup>-1</sup> | ~71 %                        | 744 mA h g <sup>-1</sup> /<br>550 mA h g <sup>-1</sup> | ~215 mA h g <sup>-1</sup>  | 100          | S1        |
| NiS nano rods-rGO                                 | 0.005-3.0 V   | 50 mA g <sup>-1</sup>  | ~75 %                        | 701 mA h g <sup>-1</sup> /<br>524 mA h g <sup>-1</sup> | ~500 mA h g <sup>-1</sup>  | 3            | S2        |
| Ni <sub>3</sub> S <sub>2</sub> powders            | 0.04-2.6 V    | 50 mA g <sup>-1</sup>  | 90 %                         | 420 mA h g <sup>-1</sup> /<br>376 mA h g <sup>-1</sup> | 342 mA h g <sup>-1</sup>   | 15           | S3        |
| Ni <sub>3</sub> S <sub>2</sub> powders            | 0.4-2.6 V     | 450 mA g <sup>-1</sup> | -                            | 430 mA h g <sup>-1</sup>                               | 220 mA h g <sup>-1</sup>   | 100          | S4        |
| Monolithic Ni <sub>3</sub> S <sub>2</sub>         | 0.5-2.5 V     | 20 μA cm <sup>-2</sup> | -                            | 220 μA h cm <sup>-2</sup>                              | ~170 μA h cm <sup>-2</sup> | 20           | S5        |
| Layered nickel sulfide-rGO                        | 0.005-3.0 V   | 100 mA g <sup>-1</sup> | 80 %                         | 665 mA h g <sup>-1</sup> /<br>529 mA h g <sup>-1</sup> | 392 mA h g <sup>-1</sup>   | 50           | S6        |

## References

- S1. Jiang, Y. *et al.* Transition metal oxides for high performance sodium ion battery anodes. *Nano Energy* **5**, 60–66 (2014).
- S2. Pan, Q. *et al.* Reduced graphene oxide-induced recrystallization of NiS nanorods to nanosheets and the improved Na-storage properties. *Inorg. Chem.* **53**, 3511–3518 (2014).
- S3. Kim, J. S. *et al.* The discharge properties of Na/Ni<sub>3</sub>S<sub>2</sub> cell at ambient temperature. *J. Power Sources* **178**, 852–856 (2008).
- S4. Ryu, H. S. *et al.* Degradation mechanism of room temperature Na/Ni<sub>3</sub>S<sub>2</sub> cells using Ni<sub>3</sub>S<sub>2</sub> electrodes prepared by mechanical alloying. *J. Power Sources* **244**, 764–770 (2013).
- S5. Go, D. Y. *et al.* Electrochemical properties of monolithic nickel sulfide electrodes for use in sodium batteries. *Mater. Res. Bull.* **58**, 190–194 (2014).
- S6. Qin, W., Chen, T., Lu, T., Chua, D. H. & Pan, L. Layered nickel sulfide-reduced graphene oxide composites synthesized via microwave-assisted method as high performance anode materials of sodium-ion batteries. *J. Power Sources* **302**, 202–209 (2016).
